# Supplementary material for: Endogenous opioids regulate social threat learning in humans
Source: PubMed Central journal article supplement (PMC5458514; doi:10.1038/ncomms15495), 2017-05-25
Supplement: ncomms15495-s1.pdf [file ncomms15495-s1.pdf]

# Supplementary Information

## Supplementary Figures

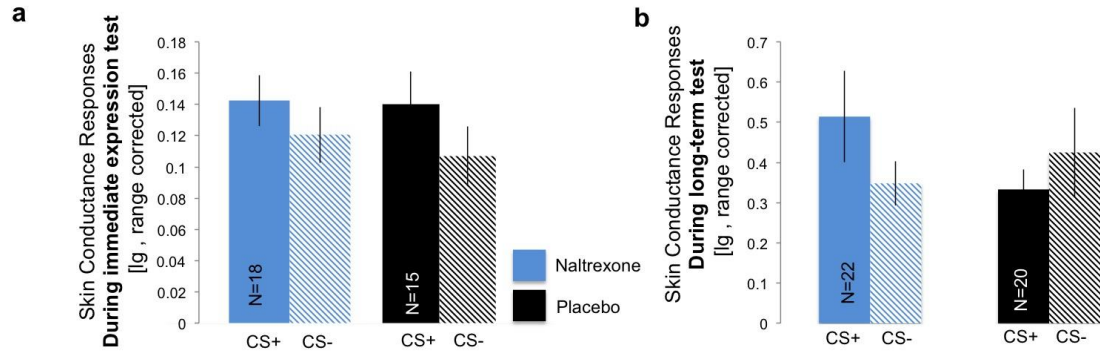

### Supplementary Figure 1

(a) Skin conductance responses during the immediate expression test, illustrating a main effect of stimulus-type (CS+>CS-) in absence of an effect of group. (b) Skin conductance responses during long-term test, illustrating a stimulus-type (CS+>CS-) by group interaction, reflecting higher discrimination between CSs in the Naltrexone as compared to the Placebo group.

Error-bars denote the standard error of the mean.

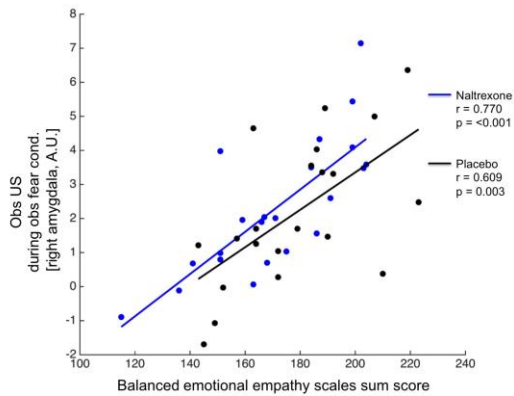

### Supplementary Figure 2

Correlation between the balanced emotional empathy scales and amygdala activity towards the observational US in both groups.

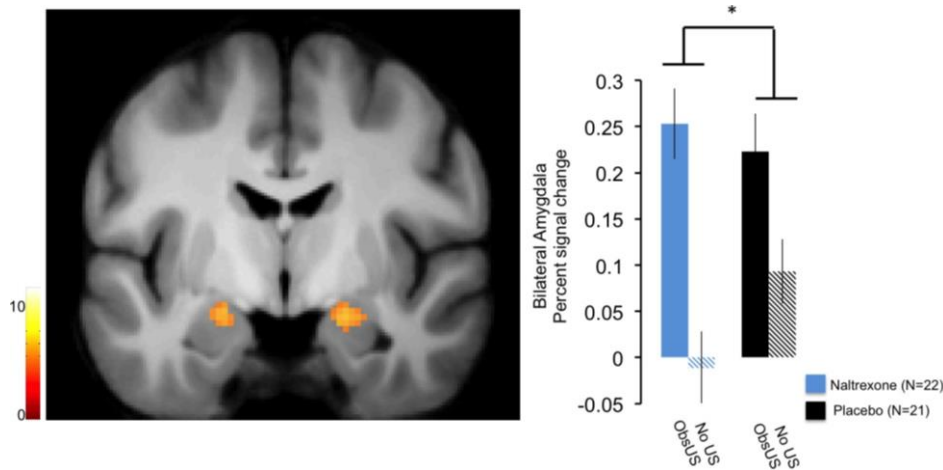

### Supplementary Figure 3

Specific responses towards observational US and no observational US trials. Amygdala responses to the observational US were enhanced in the Naltrexone group as compared to Placebo controls. The error-bars denote the standard error of the mean and T-maps are superimposed on an average structural image with a threshold of  $p(\text{FWE, whole brain}) < 0.05$  for illustrative purposes.

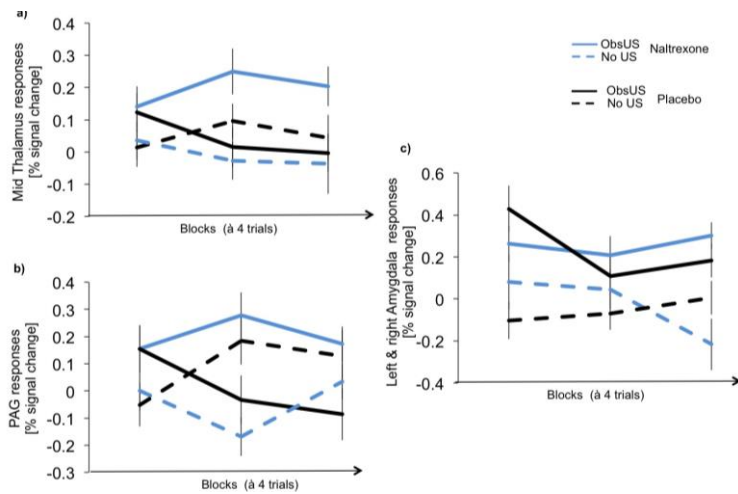

### Supplementary Figure 4

Block-wise responses in the PAG and midline thalamus to the observational US were persistent over time in the Naltrexone group as compared to Placebo controls. Importantly, both groups differentiate between observational US and no observational US trials in these structures in the first block. The error-bars denote the standard error of the mean.

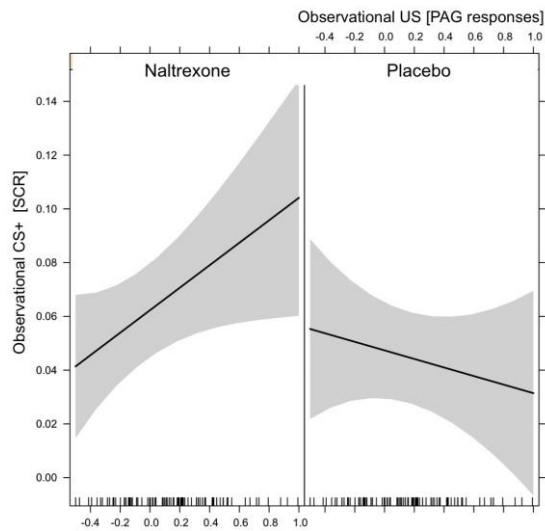

### Supplementary Figure 5

Logistic linear mixed model regression of PAG responses towards the observational US predicting the SCRs to the CS+ in the Naltrexone (left) and Placebo group (right)

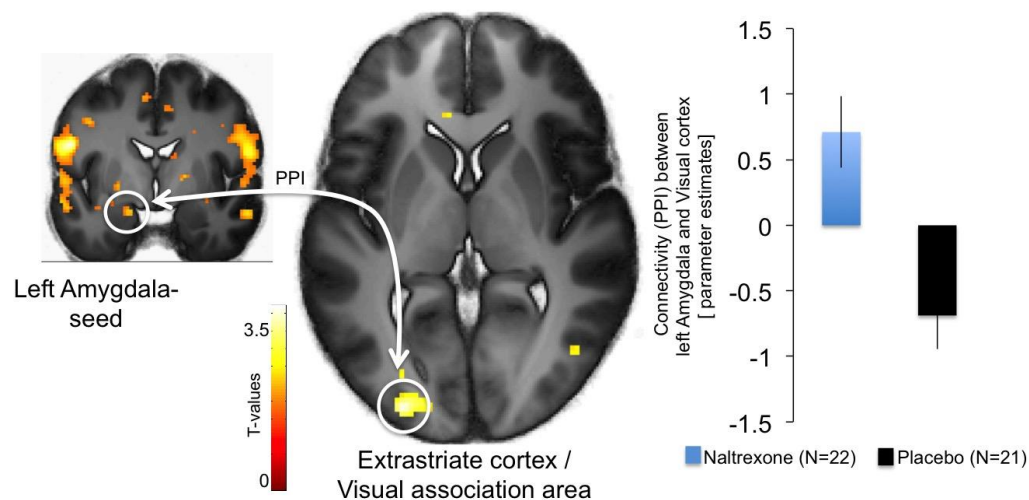

### Supplementary Figure 6

Responses in the left amygdala displayed an increased functional connectivity (PPI) with in the extrastriate cortex/visual association area (Brodmann area 19) in the Naltrexone, as compared to Placebo, group  $[x,y,z(\text{MNI}) = x;y;z: -28;-90;2]; t=3.73; p(\text{uncorrected}) < 0.001]$ . The error-bars denote the standard error of the mean, and T-maps are superimposed on an average structural image with a threshold of  $p(\text{uncorrected}) < 0.01$  for illustrative purposes.

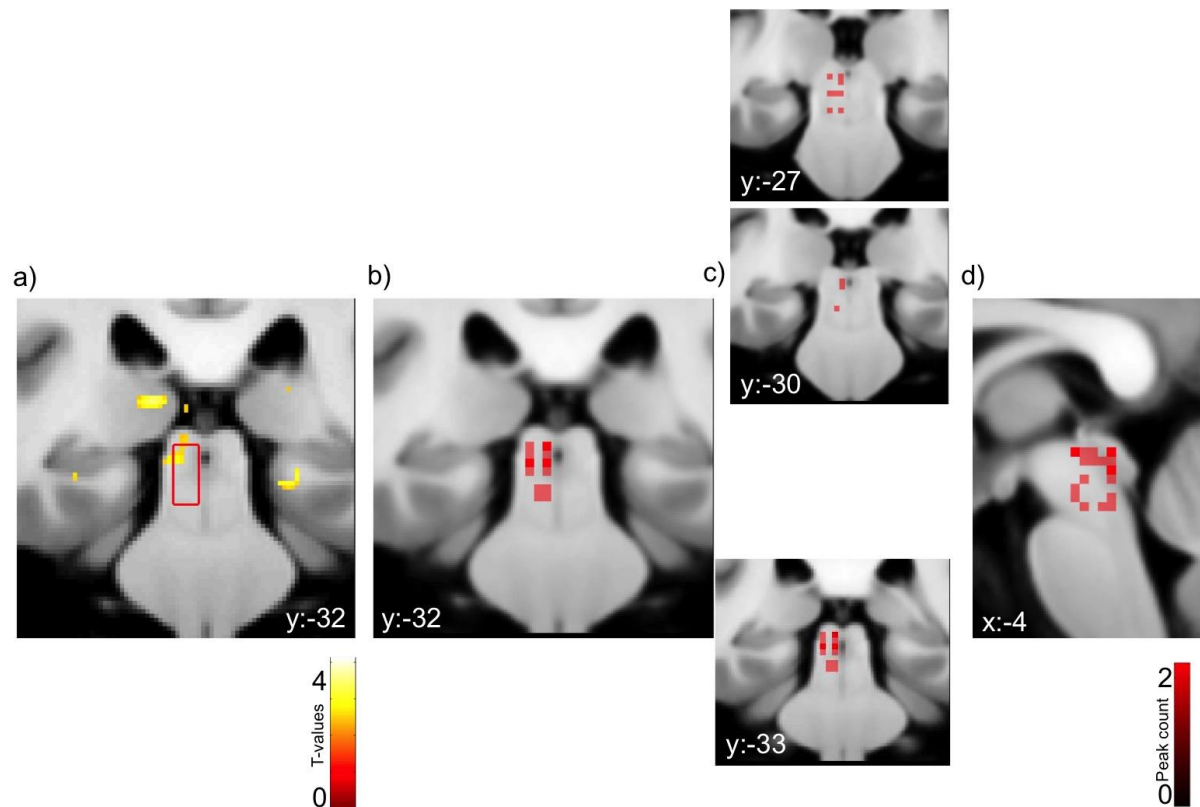

### Supplementary Figure 7

Higher Responses to the observational US (obs US > no obs US) in the Naltrexone group as compared to Placebo. a) The average group difference is located within an average location ( $\pm$  SD) of the left PAG as defined in a Metaanalysis by Linnmann et al. 2012 (indicated by the red line),  $p(\text{SVC})=0.026$ ;  $t=3.55$ ;  $x:-7$ ;  $y:-32$ ;  $z:-8$ . b-d) Location of the maxima of individual effect sizes (each square represents a participant) within this average PAG location revealed majorly activity close to the central aqueduct, and some maximal effects in neighbouring regions

## Supplementary Tables

### Supplementary Table 1

Results of the repeated measurements ANOVAs of the immediate test stage. Significant effects and trends ( $p < 0.1$ ) are marked in bold.

| <b>SCR Immediate Test stage</b> |                 |               |                 |                  |
|---------------------------------|-----------------|---------------|-----------------|------------------|
|                                 | df,<br>df error | F             | p               | eta <sup>2</sup> |
| <i>CS-type</i>                  | <b>1,31</b>     | <b>5.215</b>  | <b>.029</b>     | <b>.144</b>      |
| <i>Block</i>                    | <b>2,62</b>     | <b>44.286</b> | <b>&lt;.001</b> | <b>.588</b>      |
| <i>Group</i>                    | 1,31            | <1            | .741            | .004             |
| <i>CS-type* Block</i>           | <b>1,31</b>     | <b>6.329</b>  | <b>.007</b>     | <b>.170</b>      |
| <i>CS-type* Group</i>           | 1,31            | <1            | .637            | .007             |
| <i>Block* Group</i>             | 1,31            | <1            | .981            | <.001            |
| <i>CS-type* Block* Group</i>    | 1,31            | <1            | .691            | .009             |

### Supplementary Table 2

Results of the repeated measurements ANOVAs of the long-term test stage. Significant effects and trends ( $p < 0.1$ ) are marked in bold.

| <b>SCR long-term Test stage</b> |                 |              |             |                  |
|---------------------------------|-----------------|--------------|-------------|------------------|
|                                 | df,<br>df error | F            | p           | eta <sup>2</sup> |
| <i>CS-type</i>                  | 1,40            | <1           | .249        | .006             |
| <i>Group</i>                    | 1,40            | <1           | .600        | .007             |
| <i>CS-type*Group</i>            | 1,40            | <b>3.713</b> | <b>.061</b> | <b>.085</b>      |

### Supplementary Table 3

Linear mixed model Regression of the SCRs towards the observational CS+ Analysis of Deviance Table (Type III Wald F tests with Kenward-Roger degrees of freedom)

| <b>Factor</b>                                                                  | <b>F-Value</b> | <b>Df</b> | <b>Df (error)</b> | <b>p</b>  |
|--------------------------------------------------------------------------------|----------------|-----------|-------------------|-----------|
| <b>Intercept</b>                                                               | 50.35          | 1         | 30                | 7.098e-08 |
| <b>PAG responses towards the obs US</b>                                        | 4.10           | 1         | 94                | 0.045     |
| <b>pharmacological group</b>                                                   | 1.40           | 1         | 33                | 0.244     |
| <b>INTERACTION</b><br>PAG responses towards the obs US * pharmacological group | 3.65           | 1         | 94                | 0.059     |

### Supplementary Table 4

As a control analysis, the PAG responses to the observational US did not predict the SCRs towards the observational CS-. Linear mixed model Regression of the SCRs towards the observational CS+

Analysis of Deviance Table (Type III Wald F tests with Kenward-Roger degrees of freedom)

| Factor                                                                            | F-Value | Df | Df (error) | p         |
|-----------------------------------------------------------------------------------|---------|----|------------|-----------|
| <b>Intercept</b>                                                                  | 37.53   | 1  | 30         | 1.028e-06 |
| <b>PAG responses towards the obs US</b>                                           | 1.06    | 1  | 94         | 0.306     |
| <b>pharmacological group</b>                                                      | 0.11    | 1  | 33         | 0.739     |
| <b>INTERACTION</b><br>PAG responses towards the obs US<br>* pharmacological group | 2.00    | 1  | 94         | 0.161     |

### Supplementary Table 5

Observational learning stage, observational US responses across groups; p(FWE, whole brain)

| Contrast                                                                           | Region                                                                       | x   | y   | z   | t     | k    | p(FWE, whole brain) |
|------------------------------------------------------------------------------------|------------------------------------------------------------------------------|-----|-----|-----|-------|------|---------------------|
| CS+ outcomes:<br>observational US > no<br>observational US<br><b>across groups</b> |                                                                              |     |     |     |       |      |                     |
|                                                                                    | right middle temporal gyrus                                                  | 54  | -62 | 4   | 11.02 | 2020 | <0.001              |
|                                                                                    | left middle temporal gyrus                                                   | -58 | -52 | 10  | 7.92  | 677  | <0.001              |
|                                                                                    | right fusiform gyrus                                                         | 44  | -46 | -20 | 7.89  | 138  | <0.001              |
|                                                                                    | right occipital inferior gyrus                                               | 28  | -92 | -2  | 7.34  | 81   | <0.001              |
|                                                                                    | right inferior frontal gyrus, triangular part / right anterior insula cortex | 52  | 24  | 2   | 6.69  | 148  | <0.001              |
|                                                                                    | right amygdala                                                               | 20  | -4  | -16 | 6.68  | 88   | <0.001              |
|                                                                                    | right precentral gyrus                                                       | 44  | 4   | 46  | 6.40  | 73   | <0.001              |
|                                                                                    | NA /posterior cingulate                                                      | 0   | -26 | 24  | 6.36  | 66   | <0.001              |
|                                                                                    | left supramarginal gyrus                                                     | -60 | -42 | 28  | 6.27  | 62   | <0.001              |
|                                                                                    | left amygdala                                                                | -20 | -6  | -14 | 6.23  | 20   | <0.001              |
|                                                                                    | right inferior frontal gyrus, opercular part                                 | 48  | 18  | 26  | 6.13  | 49   | 0.002               |
|                                                                                    | left fusiform gyrus                                                          | -44 | -54 | -22 | 6.13  | 18   | 0.002               |
|                                                                                    | cerebellum                                                                   | -22 | -78 | -38 | 6.05  | 22   | 0.002               |

|  |                                              |     |     |     |      |    |       |
|--|----------------------------------------------|-----|-----|-----|------|----|-------|
|  | right inferior frontal gyrus, opercular part | 34  | 10  | 30  | 5.95 | 14 | 0.004 |
|  | right inferior frontal gyrus, opercular part | 50  | 20  | 14  | 5.85 | 18 | 0.005 |
|  | left caudate                                 | -10 | 4   | 8   | 5.53 | 9  | 0.017 |
|  | right inferior frontal gyrus, opercular part | 44  | 26  | -8  | 5.49 | 4  | 0.020 |
|  | left precuneus                               | -6  | -64 | 34  | 5.36 | 3  | 0.031 |
|  | right fusiform gyrus                         | 38  | -48 | -12 | 5.24 | 1  | 0.047 |

### Supplementary Table 6

Observational learning stage, observational US responses between groups;  $p(\text{uncorrected}) < 0.001$

| Contrast                               | Region              | x   | y   | z   | t    | p(uncorr)   |
|----------------------------------------|---------------------|-----|-----|-----|------|-------------|
| Obs US > no US in Naltrexone > Placebo |                     |     |     |     |      |             |
|                                        | Rolandic Oper L     | -54 | -8  | 24  | 5.53 | 1.85E-07    |
|                                        | Heschl R            | 58  | -12 | 10  | 4.34 | 2.04E-05    |
|                                        | Rolandic Oper R     | 54  | -8  | 26  | 4.30 | 2.32E-05    |
|                                        | Parietal Inf L      | -52 | -46 | 52  | 4.30 | 2.34E-05    |
|                                        | Cingulate Mid R     | 10  | -50 | 28  | 4.23 | 3.01E-05    |
|                                        | Cerebelum 6 R       | 24  | -54 | -24 | 4.18 | 3.57E-05    |
|                                        | ParaHippocampal L   | -34 | -30 | -12 | 4.13 | 4.36E-05    |
|                                        | Frontal Sup 2 R     | 22  | 22  | 56  | 4.12 | 4.57E-05    |
|                                        | Insula L            | -36 | -14 | 4   | 4.11 | 4.71E-05    |
|                                        | Temporal Sup L      | -38 | -58 | 26  | 4.10 | 4.88E-05    |
|                                        | Occipital Mid L     | -36 | -66 | 10  | 4.09 | 5.04E-05    |
|                                        | Cerebelum 6 R       | 16  | -64 | -22 | 4.08 | 5.17E-05    |
|                                        | Temporal Pole Sup L | -44 | 16  | -22 | 4.08 | 5.18E-05    |
|                                        | Parietal Inf L      | -46 | -28 | 52  | 4.06 | 5.63E-05    |
|                                        | Precuneus L         | -10 | -48 | 14  | 4.03 | 6.18E-05    |
|                                        | Frontal Sup 2 L     | -34 | 14  | 48  | 3.88 | 0.000103566 |
|                                        | OFCpost R           | 42  | 24  | -18 | 3.87 | 0.00010796  |
|                                        | Postcentral L       | -44 | -6  | 38  | 3.86 | 0.000111387 |
|                                        | Vermis 3            | 0   | -50 | 0   | 3.82 | 0.000127271 |
|                                        | Frontal Mid 2 L     | -26 | 28  | 40  | 3.82 | 0.000127811 |
|                                        | Postcentral L       | -60 | -20 | 34  | 3.81 | 0.000132562 |
|                                        | Hippocampus R       | 38  | -10 | -12 | 3.80 | 0.000138812 |
|                                        | Cingulate Mid R     | 8   | 40  | 30  | 3.80 | 0.000140107 |
|                                        | Cingulate Ant R     | 0   | 46  | 28  | 3.77 | 0.000152183 |
|                                        | Cerebelum 6 L       | -12 | -64 | -18 | 3.75 | 0.000165559 |
|                                        | Angular L           | -40 | -72 | 44  | 3.71 | 0.00018652  |
|                                        | Angular L           | -50 | -72 | 26  | 3.68 | 0.000207424 |
|                                        | Cerebelum Crus2 L   | -28 | -82 | -34 | 3.64 | 0.000235927 |
|                                        | Precentral R        | 64  | 2   | 26  | 3.63 | 0.000242604 |
|                                        | OFClat L            | -52 | 30  | -12 | 3.62 | 0.000255647 |
|                                        | Cingulate Ant R     | 16  | 40  | 6   | 3.59 | 0.000280718 |

|                                           |                      |     |     |     |      |             |
|-------------------------------------------|----------------------|-----|-----|-----|------|-------------|
|                                           | Temporal Mid R       | 60  | -24 | -8  | 3.59 | 0.000283122 |
|                                           | Cingulate Ant R      | 10  | 28  | 16  | 3.57 | 0.000303875 |
|                                           | Frontal Sup Medial L | -14 | 60  | 6   | 3.56 | 0.000306576 |
|                                           | Temporal Mid R       | 54  | -62 | 12  | 3.55 | 0.000316263 |
|                                           | Frontal Mid 2 R      | 28  | 16  | 42  | 3.55 | 0.000321818 |
|                                           | Temporal Mid L       | -62 | -16 | -12 | 3.55 | 0.000322708 |
|                                           | Cerebelum Crus2 R    | 28  | -78 | -30 | 3.53 | 0.000343337 |
|                                           | Precuneus L          | 0   | -44 | 38  | 3.52 | 0.000350497 |
|                                           | Thalamus L           | -6  | -26 | 2   | 3.48 | 0.000405595 |
|                                           | Angular L            | -56 | -58 | 34  | 3.48 | 0.000407141 |
|                                           | Calcarine L          | -20 | -86 | 0   | 3.47 | 0.000417014 |
|                                           | Temporal Mid R       | 58  | -4  | -20 | 3.46 | 0.000431158 |
|                                           | Frontal Mid 2 R      | 26  | 22  | 34  | 3.41 | 0.000499984 |
|                                           | Temporal Sup L       | -50 | -14 | 4   | 3.39 | 0.00054433  |
|                                           | Supp Motor Area L    | -12 | -10 | 56  | 3.38 | 0.000564487 |
|                                           | Temporal Mid L       | -52 | -20 | -12 | 3.35 | 0.000618504 |
|                                           | Frontal Inf Tri L    | -56 | 16  | 6   | 3.33 | 0.000646248 |
|                                           | Frontal Med Orb R    | 12  | 44  | -2  | 3.31 | 0.000683995 |
|                                           | Angular R            | 56  | -62 | 26  | 3.31 | 0.000696963 |
| Obs US > no US in<br>Placebo > Naltrexone |                      |     |     |     |      |             |
| no voxel above threshold                  |                      |     |     |     |      |             |
|                                           |                      |     |     |     |      |             |

### Supplementary Table 7

Observational learning stage, CS responses between groups; ROI

| Contrast                          | Region         | x,y,z      | t    | k  | p(FWE, ROI) |
|-----------------------------------|----------------|------------|------|----|-------------|
| CS+ > CS- in Naltrexone > Placebo |                |            |      |    |             |
|                                   | right amygdala | -16 -4 -18 | 3.21 | 19 | 0.043       |
| CS+ > CS- in Placebo > Naltrexone |                |            |      |    |             |
|                                   | n.s.           |            |      |    |             |



### Supplementary Table 8

Immediate test stage, Direct CS responses. We analyzed BOLD contrast of linearly decreasing conditioned responses over time (as indicated by the time\*stimulus type interaction in the SCR) during the Immediate test stage to test if the groups differed in their hemodynamic activity during fear expression.

| Contrast                                            | Region                | x   | y  | z   | t    | k  | p (FWE, ROI) |
|-----------------------------------------------------|-----------------------|-----|----|-----|------|----|--------------|
| Decrease in CS+ > CS-<br>in Placebo ><br>Naltrexone |                       |     |    |     |      |    |              |
|                                                     | right amygdala<br>ROI | 26  | -8 | -14 | 3.20 | 33 | 0.039        |
|                                                     | left amygdala<br>ROI  | -22 | -2 | -24 | 3.11 | 9  | 0.055        |
| Decrease in CS+ > CS-<br>in Naltrexone ><br>Placebo |                       |     |    |     |      |    |              |
|                                                     | n.s.                  |     |    |     |      |    |              |

### Supplementary Table 9

Contributed weight per region to classification analysis

| Region (Harvard-Oxford Atlas)                      | ROI weight | Voxel in ROI | Exp. Ranking |
|----------------------------------------------------|------------|--------------|--------------|
| Superior Temporal Gyrus, anterior division Right   | 3.6824     | 7            | 0.9767       |
| Temporal Pole Left                                 | 2.5900     | 82           | 2.4419       |
| Caudate Right                                      | 2.5628     | 64           | 2.8372       |
| Middle Temporal Gyrus, anterior division Left      | 2.3999     | 39           | 3.8140       |
| Thalamus Right                                     | 2.2302     | 62           | 4.8140       |
| Central Opercular Cortex Right                     | 2.0318     | 47           | 6.4186       |
| Occipital Fusiform Gyrus Left                      | 1.9318     | 31           | 7.5349       |
| Cingulate Gyrus, posterior division                | 1.7749     | 3            | 9.9767       |
| Supramarginal Gyrus, anterior division Left        | 1.6627     | 54           | 11.2093      |
| Temporal Occipital Fusiform Cortex Left            | 1.6534     | 260          | 11.1163      |
| Caudate Left                                       | 1.6450     | 19           | 11.8605      |
| Middle Temporal Gyrus, temporooccipital part Left  | 1.5976     | 787          | 12.3721      |
| Inferior Frontal Gyrus, pars triangularis Left     | 1.5615     | 313          | 13.7907      |
| Inferior Frontal Gyrus, pars opercularis Right     | 1.5580     | 65           | 14.0698      |
| Lateral Occipital Cortex, inferior division Right  | 1.5432     | 135          | 14.7442      |
| Cerebellum Crus2 Left                              | 1.5158     | 375          | 16.0         |
| Occipital Pole Left                                | 1.5082     | 141          | 16.2093      |
| Supplementary Motor Cortex Right                   | 1.4780     | 1            | 19.8140      |
| Cerebellum 7b Left                                 | 1.4399     | 123          | 19.8140      |
| Insular Cortex Left                                | 1.4331     | 124          | 19.8372      |
| Middle Temporal Gyrus, temporooccipital part Right | 1.3477     | 50           | 23.3721      |
| Middle Temporal Gyrus, posterior division Left     | 1.3375     | 386          | 24.8140      |
| Superior Frontal Gyrus Right                       | 1.3357     | 60           | 25.1628      |

|                                                      |        |      |         |
|------------------------------------------------------|--------|------|---------|
| Pallidum Right                                       | 1.3176 | 21   | 27.3256 |
| Frontal Pole Left                                    | 1.3159 | 179  | 26.8372 |
| Cuneal Cortex Right                                  | 1.3136 | 175  | 26.3256 |
| Frontal Orbital Cortex Left                          | 1.3096 | 389  | 26.6047 |
| Inferior Frontal Gyrus, pars opercularis Left        | 1.3089 | 491  | 26.5814 |
| Cerebelum Crus1 Right                                | 1.2980 | 539  | 27.9535 |
| Cerebelum 3 Left                                     | 1.2744 | 147  | 31.3023 |
| Lateral Occipital Cortex, superioir division Left    | 1.2674 | 66   | 31.1860 |
| Vermis 6                                             | 1.2661 | 3    | 32.0698 |
| Superior Temporal Gyrus, anterior division Left      | 1.2577 | 53   | 31.6744 |
| Angular Gyrus Right                                  | 1.2435 | 491  | 31.8140 |
| Parahippocampal Gyrus, anterior division Right       | 1.2082 | 100  | 34.6279 |
| Angular Gyrus Left                                   | 1.2044 | 477  | 35.3953 |
| Parietal Operculum Cortex Right                      | 1.1876 | 8    | 37.3488 |
| Lateral Occipital Cortex, superioir division Right   | 1.1708 | 272  | 37.4419 |
| Temporal Occipital Fusiform Cortex Right             | 1.1655 | 27   | 38.2093 |
| Middle Frontal Gyrus Left                            | 1.1571 | 556  | 38.5581 |
| Supramarginal Gyrus, posterior division Left         | 1.1464 | 583  | 39      |
| Precuneous Cortex                                    | 1.1325 | 268  | 40.3488 |
| Middle Frontal Gyrus Right                           | 1.1223 | 27   | 41.5349 |
| Inferior Temporal Gyrus, temporooccipital part Left  | 1.1029 | 68   | 43      |
| Putamen Left                                         | 1.0933 | 8    | 43.9767 |
| Lateral Occipital Cortex, inferior division Left     | 1.0713 | 1108 | 44.8605 |
| Superior Frontal Gyrus Left                          | 1.0464 | 233  | 46.3023 |
| Insular Cortex Right                                 | 1.0404 | 47   | 46.7209 |
| Frontal Pole Right                                   | 1.0296 | 2468 | 48.2558 |
| Supramarginal Gyrus, posterior division Right        | 1.0205 | 103  | 48.3023 |
| Parietal Operculum Cortex Left                       | 1.0144 | 38   | 49.7674 |
| Cerebelum Crus2 Right                                | 1.0045 | 289  | 50.4651 |
| Putamen Right                                        | 0.9715 | 64   | 51.6977 |
| PP r (Planum Polare Right)                           | 0.9428 | 48   | 54.4884 |
| Temporal Fusiform Cortex, anterior division Left     | 0.9409 | 1    | 54.3721 |
| Superior Temporal Gyrus, posterior division Left     | 0.9372 | 168  | 55.3488 |
| Intracalcarine Cortex Right                          | 0.9275 | 749  | 55.5814 |
| Precentral Gyrus Right                               | 0.9203 | 60   | 54.2791 |
| Frontal Operculum Cortex Right                       | 0.9052 | 27   | 56.2326 |
| Central Opercular Cortex                             | 0.8902 | 10   | 57.1395 |
| Hippocampus Left                                     | 0.8758 | 118  | 58.8372 |
| Accumbens Right                                      | 0.8712 | 155  | 60.3256 |
| Inferior Temporal Gyrus, anterior division Right     | 0.8555 | 501  | 60.3488 |
| Amygdala Left                                        | 0.8455 | 265  | 61.5349 |
| Precentral Gyrus Left                                | 0.8189 | 206  | 62.2558 |
| Intracalcarine Cortex Left                           | 0.7688 | 33   | 62.6047 |
| Pallidum Left                                        | 0.7609 | 3    | 64.7209 |
| Planum Temporale Left                                | 0.7345 | 27   | 67.1163 |
| Occipital Fusiform Gyrus Right                       | 0.7320 | 134  | 66.8372 |
| Thalamus Left                                        | 0.7152 | 9    | 68.6512 |
| Frontal Operculum Cortex Left                        | 0.6709 | 111  | 70.2558 |
| Middle Temporal Gyrus, anterior division Right       | 0.6526 | 2    | 68.3953 |
| Cerebelum 7b Right                                   | 0.6447 | 1    | 72.0465 |
| Paracingulate Gyrus Left                             | 0.6185 | 5    | 69.8140 |
| Postcentral Gyrus Right                              | 0.5969 | 73   | 73.4651 |
| Cerebelum 6 Right                                    | 0.5828 | 123  | 74.1395 |
| Amygdala Right                                       | 0.5807 | 30   | 74.5581 |
| Middle Temporal Gyrus, posterior division Right      | 0.5447 | 2    | 76      |
| Temporal Pole Right                                  | 0.5354 | 70   | 76.2326 |
| Inferior Temporal Gyrus, temporooccipital part Right | 0.5316 | 8    | 77.8372 |
| Cerebelum Crus1 Left                                 | 0.5065 | 6    | 76.5349 |
| Frontal Medial Cortex                                | 0.4824 | 20   | 76.8372 |
| Cingulate Gyrus, anterior division                   | 0.4477 | 29   | 80.1395 |
| Inferior Temporal Gyrus, anterior division Left      | 0.4366 | 3    | 78.2326 |
| Inferior Temporal Gyrus, posterior division Right    | 0.3591 | 4    | 82.6047 |
| Temporal Fusiform Cortex, posterior division Left    | 0.2367 | 6    | 84.2558 |
| Lingual Gyrus Left                                   | 0.2348 | 1    | 78.9767 |

|                    |        |   |         |
|--------------------|--------|---|---------|
| Cerebellum 8 Right | 0.0114 | 1 | 85.4419 |
|--------------------|--------|---|---------|

### **Supplementary Note 1: Subjective ratings**

In order to control for difference in the perceived unpleasantness of the observational US, subjective ratings were compared between groups without revealing a difference ( $t(38) < 1$ ;  $p > .9$ ). While this speaks against an inflation of the unpleasantness of observational US, the Naltrexone group rated the delivery of the US less unpleasant for the demonstrator ( $t(39) = 2.279$ ,  $p = 0.028$ ). This effect might demark an isolated effect of opioid blockade on recognition of emotional responses in others, in line with a previous study showing that Naltrexone reduces the speed in identification of negative emotions in others<sup>1</sup>. Please note that the number of cases varies between analyses, since some specific values were missing for some participants.

Additionally, multiple regression of the balanced emotional empathy scales on hemodynamic activity towards the observational US revealed a cluster in the left amygdala in both groups.

### **Supplementary Note 2: Additional fMRI results**

#### Additional temporal modelling of PAG responses towards the observational US

In addition to the analyses of block wise responses, we modelled exponentially decreasing responses towards the observational US (contrast obs US > no obs US) in the PAG over trials. This analysis revealed that a cluster in the PAG decreased in the Placebo group (but not the Naltrexone group). This cluster overlapped with the activity reported in our manuscript (4mm sphere; -8;-30;-10;  $t = 3.17$ ,  $p(\text{SVC}) = 0.015$ ). This confirms our analyses above that the PAG time-course shows indeed a quadratic interaction over blocks between groups.

Next, we set up a simplified first level that models prediction error responses, defined as the deviation between the outcome and the expected outcome, to test if the PAG follows such a time-course. This Prediction error was modelled as absolute difference between the observed outcome of CS+ trials (observational US = 1/ no obs US = 0) and the sum of previous outcomes divided through the trial-numbers (i.e. average of outcomes of previous trials). The prediction error term was added as a parametric modulator of CS+ outcomes (controlling for the general outcome, i.e. obs US and no obs US).

A one sample t-test of activity in the Placebo groups revealed significant activity in the PAG reflecting the time-course of the prediction error (overlap with PAG activity as reported in main text: 4mm sphere x;y;z: -8;-30;-10;  $t = 3.77$ ;  $p(\text{SVC}) : 0.030$ ).

Interestingly, other regions as the medial thalamus, medial PFC and the amygdala followed this time-course.

Importantly, the same region in the PAG was stronger correlated with this prediction error time-course as compared to the Naltrexone group, which did not follow a Prediction error related time-course (x;y;z: -8;-30;-10;  $t = 3.21$ ;  $p(\text{SVC}) : 0.020$ ).

These exploratory results complement our results, suggesting that the time-course of PAG responses represent a learning related decrease of signalling to the observational US. Moreover, it suggests that blockade of opioid receptors prevents such diminution of responses.

#### Additional functional connectivity of PAG responses towards the observational US

In addition to the analyses of functional connectivity of the PAG seed region, we explored connectivity of the left amygdala (representing the difference between responses to the observational US between groups). Interestingly, we found that the Naltrexone group (as compared to Placebo) showed higher functional connectivity between the amygdala and the extrastriate cortex in the visual association area (Brodmann area 19; x;y;z:-28;-90;2);  $t=3.73$ ;  $p(\text{uncorrected}) < 0.001$ ; see figure S6). This complements our results of higher connectivity between the PAG and the STS, reported in the main text, suggesting that the Naltrexone group shows enhanced processing of observed information during the observational US.

## **Supplementary methods**

### **Skin conductance Responses (SCR) acquisition.**

Skin conductance was measured by a pair of Ag-AgCL electrodes attached to the distal phalanges of the index and middle finger of the left hand. The physiological signals were amplified and recorded using a Biopac 150 System (Biopac Systems Inc, Santa Barbara, California, USA) and filtered between 0.05 and 5Hz. Phasic skin conductance responses towards each CS onset and the observational USs, were measured as the peak-to-peak amplitude (in microsiemens,  $\mu\text{S}$ ) in the .5 to 4.5 second window following stimulus onset.

### **Logistic linear mixed model regression**

Time course of the SCRs towards the observational CS+ was analyzed using a logistic generalized linear mixed models (GLMMs) with by-subject random intercept<sup>2</sup>. The model included as factors the extracted responses to the observational US in the PAG, the pharmacological group as well as the interaction of the two latter factors. The same model was employed in a control analysis to predict the time course of the SCRs towards the observational CS-. All reported main- and interaction effects of the GLMMs were evaluated with “Type III” analysis of deviance (i.e., analogous to Type III Sum of Squares ANOVA) tests based on the Wald statistic. Note that by using Type III analysis, the order of factors within the GLMM does not influence their significance.

### **Functional connectivity analysis**

Psycho-physiological interaction (PPI, as implemented in SPM8) was employed to examine condition-specific functional connectivity between the PAG and whole brain voxel during the observational US (observational US > no observational US). Activity analyzed by extracting each participant’s BOLD time-course eigenvariate within the PAG as a seed region. The

extracted BOLD time-course eigenvariate within the PAG ROI was deconvolved and multiplied with the condition specific onsets of the observational US > no observational US contrast. The product was entered as a regressor into a GLM for each participant controlling for the time-course of the BOLD signal in the PAG and the onset regressor for observational US > no observational US contrast, as nuisance regressors. Parameter estimates of the observational US-PPI were then contrasted between groups.

### **Supervised machine learning classification**

For classification analysis of the differences in hemodynamic between the Naltrexone and Placebo group during expression of conditioned responses, we used supervised machine learning. A support vector machine (SVM) as implemented in the Pattern Recognition for Neuroimaging Toolbox [PRoNTo<sup>3</sup>] for SPM 8 was used, which initially uses data of all participants but one that are classified as Naltrexone or Placebo to establish an optimal boundary that separates the two groups (“training”). In our study we used the beta estimate images of hemodynamic responses towards the CS+ during the immediate direct expression test, restricted to a kernel including activity in regions that were responsive to the observational US ( $p < 0.001$ ). The computed boundary is then used to predict which group the data from the left out participants belongs to in a blind manner. These steps are repeated, leaving out each individual (Cross validation of “leave one participants out”). Statistical significance of classification above chance was tested using permutation testing (1000 permutations) with a random assignment of group class to the beta estimate images.

### **Supplementary References:**

- 1. Wardle, M. C., Bershad, A. K. & de Wit, H. Naltrexone alters the processing of social and emotional stimuli in healthy adults. *Soc Neurosci* 1–13 (2016).  
doi:10.1080/17470919.2015.1136355**
- 2. Baayen, R. H., Davidson, D. J. & Bates, D. M. Mixed-effects modeling with crossed random effects for subjects and items. *Journal of Memory and Language* 59, 390–412 (2008).**
- 3. Schrouff, J. et al. PRoNTo: pattern recognition for neuroimaging toolbox. *Neuroinformatics* 11, 319–337 (2013).**
